# Supplementary material for: Implications of variations in stream specific conductivity for estimating baseflow using chemical mass balance and calibrated hydrograph techniques
Source: Copernicus journal article supplement (doi:10.5194/hess-2021-454), 2021-09-23
Supplement: Supplementary file 1 [file hess-2021-454-supplement.pdf]

## Supplementary data

### Catchments

#### *Barwon Catchment*

The Barwon River is a gaining river system with a catchment area of ~2700 km<sup>2</sup> that is mainly cleared of native eucalyptus vegetation and used for dryland grazing with minor tree plantations. Streamflow and SC data from the Ricketts Marsh (223224), Kildean Lane (223247), Winchelsea (223201), Inverleigh (223218), and Pollocksford (233200) gauges on the main Barwon River and the Agroforestry (233250), Birregurra (223211), Warrambine (223223), and Leigh (223213) tributaries are used (Department of Land, Environment, Water and Planning, 2020). The catchment comprises mainly Pliocene-Pleistocene Newer Volcanics Province basalts interbedded with marine and freshwater sediments (Dahlhaus et al., 2008; Cartwright et al., 2013, 2014). Annual rainfall is between 600 to 1050 mm with July to September (the austral winter) the wettest months (Bureau of Meteorology, 2021). Total annual streamflows in the Barwon River increase downstream and 60% of the annual flow occurs between July and September (Department of Land, Environment, Water and Planning, 2021). Between 1994 and 2020, the maximum SC in the Barwon River were 11,200 µS/cm at gauge 223218 and as high as 25,762 µS/cm at gauge 223211. Higher SC values are recorded during the lower summer streamflows. The main Barwon River records flow for >95% of the time during the monitoring period (Table 1). The tributaries have a higher intermittence (flow for 33 to 99% of the study period). Shallow groundwater in the Barwon catchment typically has SC values of 5000-20,000 µS/cm (Department of Land, Environment, Water and Planning, 2021).

#### *Corangamite catchment*

The Corangamite catchment is also located on the basalt plains of the Newer Volcanics (Department of Jobs, Precincts and Regions, 2021). The catchment includes several permanent and intermittent saline to hypersaline lakes that represent groundwater discharge points in topographic lows in the basalt surface. Data are from four gauges: 234200 (Woody Yallock River at Cressy), 234201 (Woody Yallock River at Pitfield), 2344209 (Deans Creek), and 234212 (Browns Waterholes) (Department of Environment, Land, Water and Planning) that are upstream of the lakes. As with the Barwon catchment, rainfall (~720 mm/yr: Bureau of Meteorology, 2021) and streamflow are higher in the winter months. The streams recorded between 83 and 100% flows over the study period and the

maximum SC values range from 4547 to 21790  $\mu\text{S}/\text{cm}$  (Table 1). The catchment has been largely cleared for dryland agriculture with only local groundwater use, mainly for stock watering. Groundwater salinity varies from  $\sim 1000$   $\mu\text{S}/\text{cm}$  in the south of the catchment to  $>50,000$   $\mu\text{S}/\text{cm}$  (Department of Land, Environment, Water and Planning, 2021).

### *Goulburn Catchment*

The Goulburn catchment is part of the Riverine Plain of the Murray Basin (Cartwright and Weaver, 2004). The shallowest sediments are the heterogeneous terrestrial sands, silts, and clays of the Pliocene to Holocene Shepparton Formation and the contiguous Quaternary Coonambidgal Formation; these onlap basement Proterozoic granites and metamorphosed turbidites in the south of the catchment (Lawrence, 1988). Data are from four gauges from unregulated tributaries to the highly-regulated Goulburn River: 405212 (Sunday Creek), 405226 (Pranjip Creek), 405240 (Sugarloaf Creek), and 405246 (Castle Creek) (Department of Environment, Land, Water and Planning, 2021). Annual rainfall decreases southwards from 675 to 450 mm/yr (Bureau of Meteorology, 2021). Rainfall and streamflow are again higher in the winter months. The streams recorded between 37 and 77% flows over the study period and the maximum SC values range from 498 to 2370  $\mu\text{S}/\text{cm}$  (Table 1). The catchment has been largely cleared and comprises a mix of dryland and irrigated agriculture. Groundwater salinity is mainly  $<5000$   $\mu\text{S}/\text{cm}$  although local zones of higher salinity (up to 20,000  $\mu\text{S}/\text{cm}$ ) groundwater exist in the east of the catchment (Department of Land, Environment, Water and Planning, 2021).

### *Loddon Catchment*

The Loddon catchment is also part of the Riverine Plain of the Murray Basin and has similar hydrogeology to the Goulburn area (Lawrence, 1988). Data are from six gauges from unregulated tributaries to the regulated Goulburn River: 407211 (Bet Bet Creek at Bet Bet), 407239 (Middle Creek), 407252 (Barr Creek), 407284 (Calivil Creek), 407288 (Bet Bet Creek at Lillicur), and 407289 (Nine Mile Creek) (Department of Environment, Land, Water and Planning, 2021). Annual rainfall decreases southwards from 580 to 420 mm/yr (Bureau of Meteorology, 2021). Rainfall and streamflow are again higher in the winter months. The streams recorded between 54 and 94% flows over the study period and the maximum SC values range from 1896 to 36919  $\mu\text{S}/\text{cm}$  (Table 1). Shallow groundwater in the

Barwon catchment typically has SC values of 7000-30,000  $\mu\text{S}/\text{cm}$  (Department of Land, Environment, Water and Planning, 2021). The catchment is largely cleared and predominantly used for dryland agriculture.

## BFI from the CMB method

Figure S1. Variations in annual BFI and Discharge (Q in m<sup>3</sup>/sec) for the Barwon Catchment calculated using the constant SC (squares) and variable SC (diamonds) method.

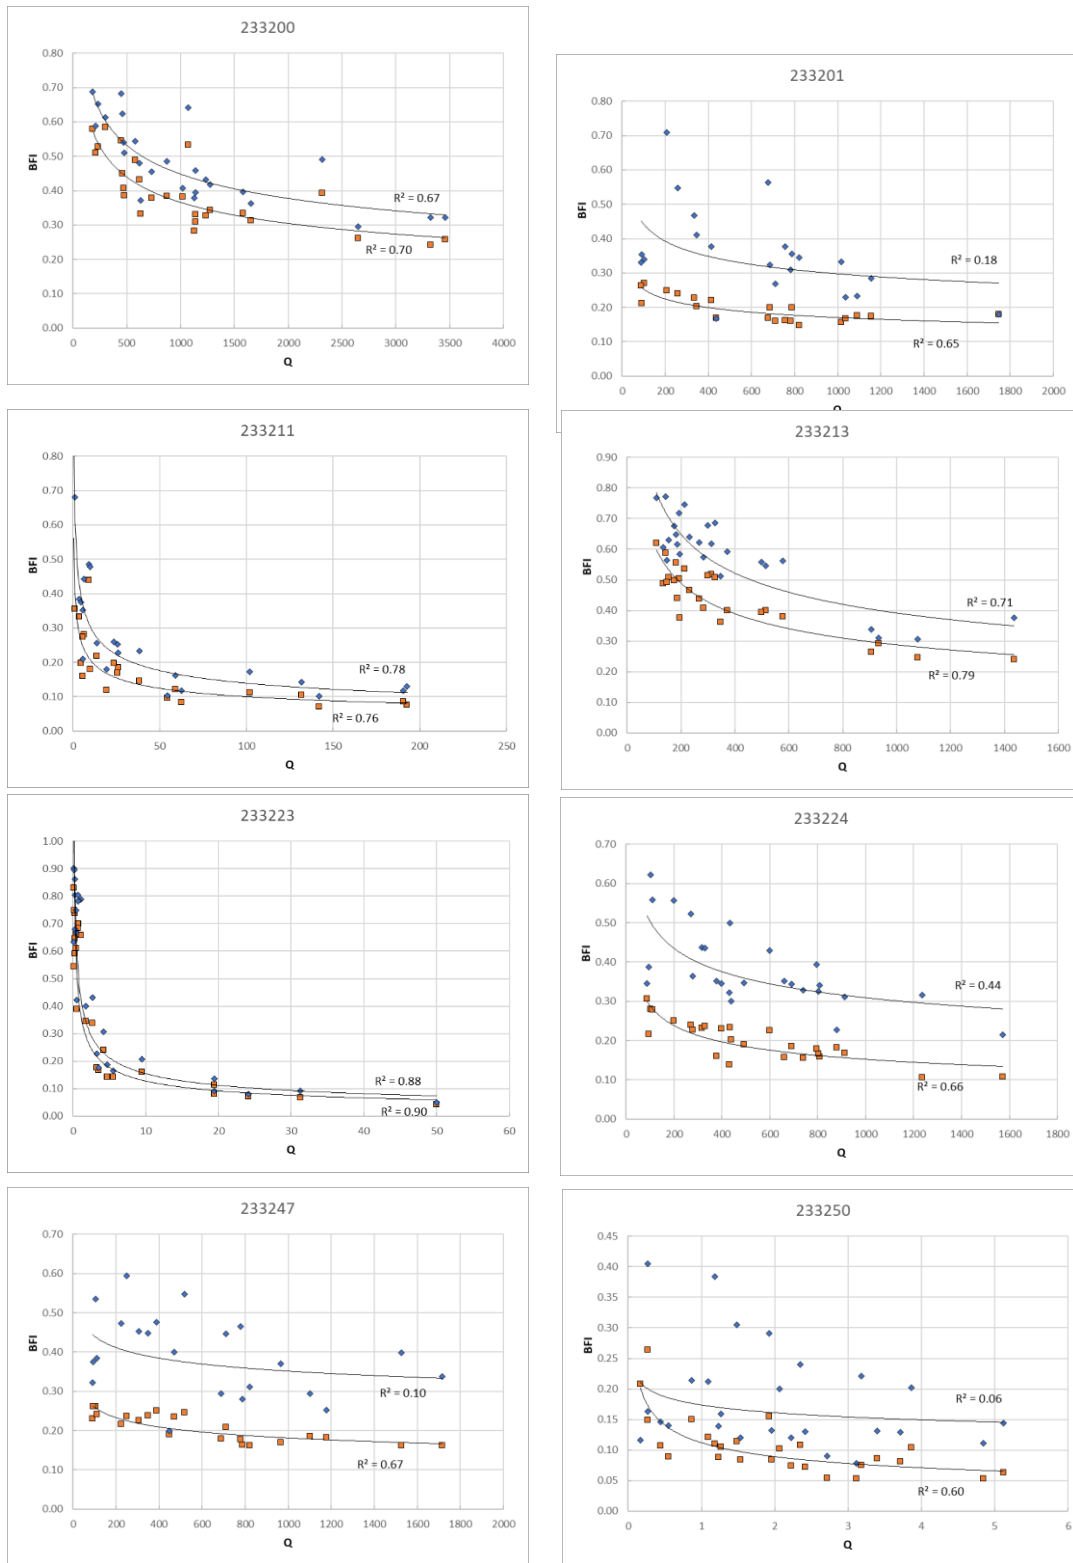

Figure S2. Variations in annual BFI and Discharge (Q in m<sup>3</sup>/sec) for the Corangamite Catchment calculated using the constant SC (squares) and variable SC (diamonds) method.

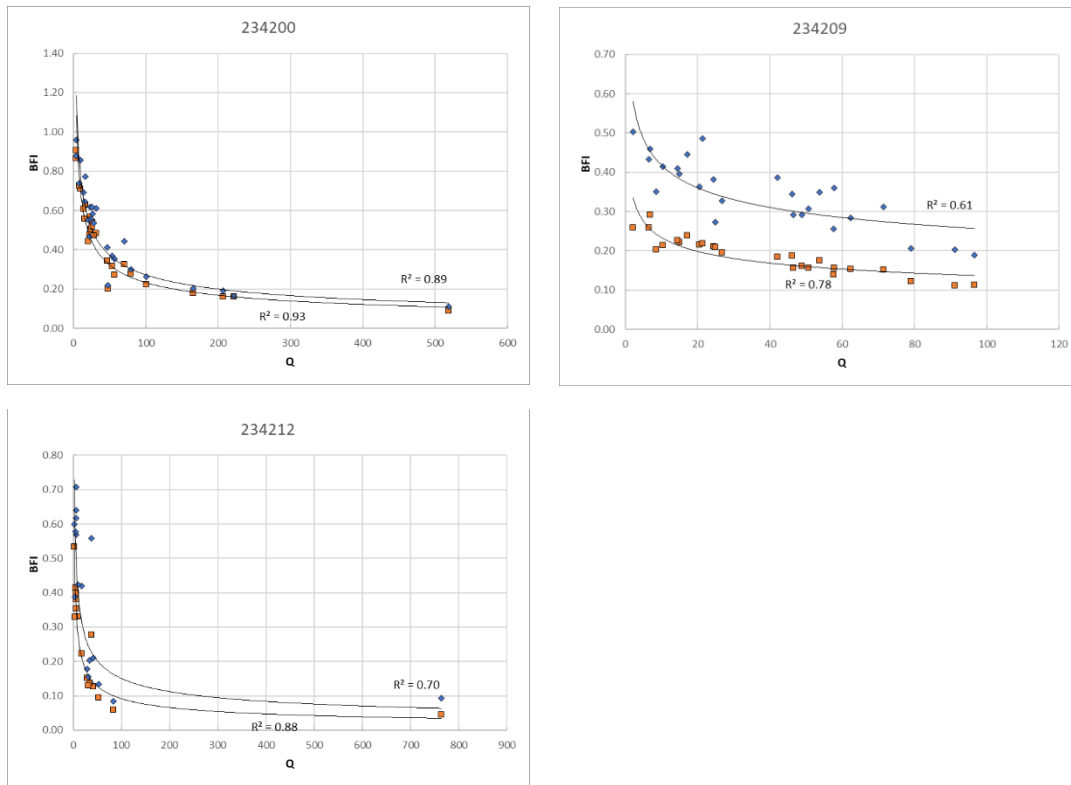

Figure S3. Variations in annual BFI and Discharge (Q in m<sup>3</sup>/sec) for the Goulburn Catchment calculated using the constant SC (squares) and variable SC (diamonds) method.

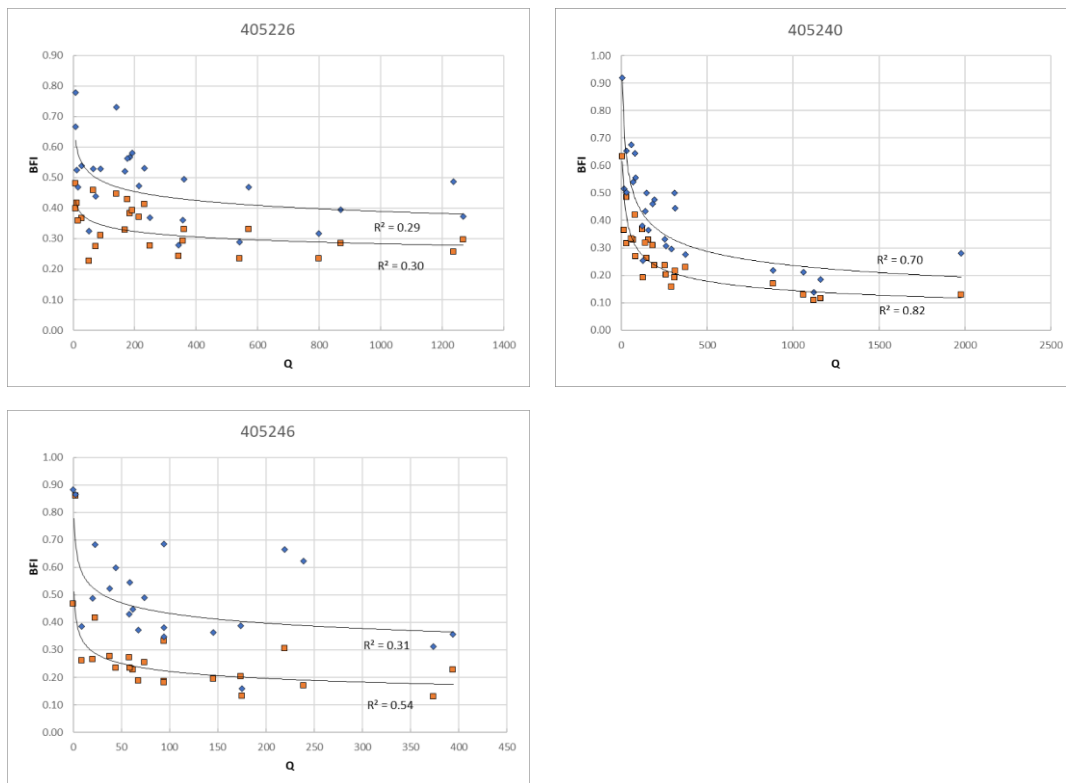

Figure S4. Variations in annual BFI and Discharge (Q in m<sup>3</sup>/sec) for the Goulburn Catchment calculated using the constant SC (squares) and variable SC (diamonds) method.

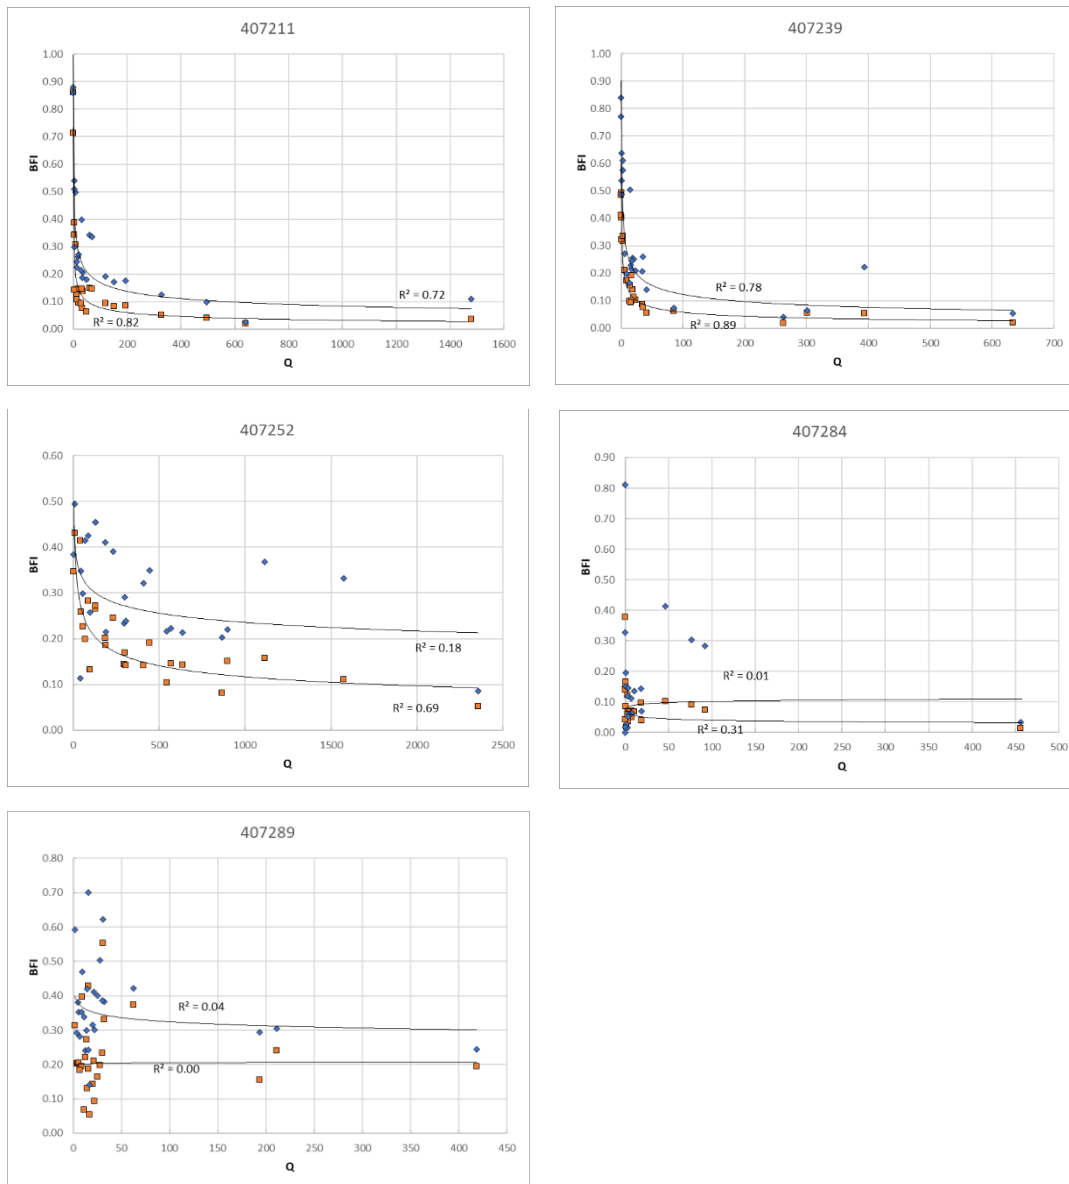

## Comparison of BFI from CMB and hydrograph-based techniques

Figure S5. Comparison BFI calculated from the RDF and SM methods with the BFI from CMB using the variable and constant SC calculations for the Barwon Catchment (symbols as for Fig. 5).

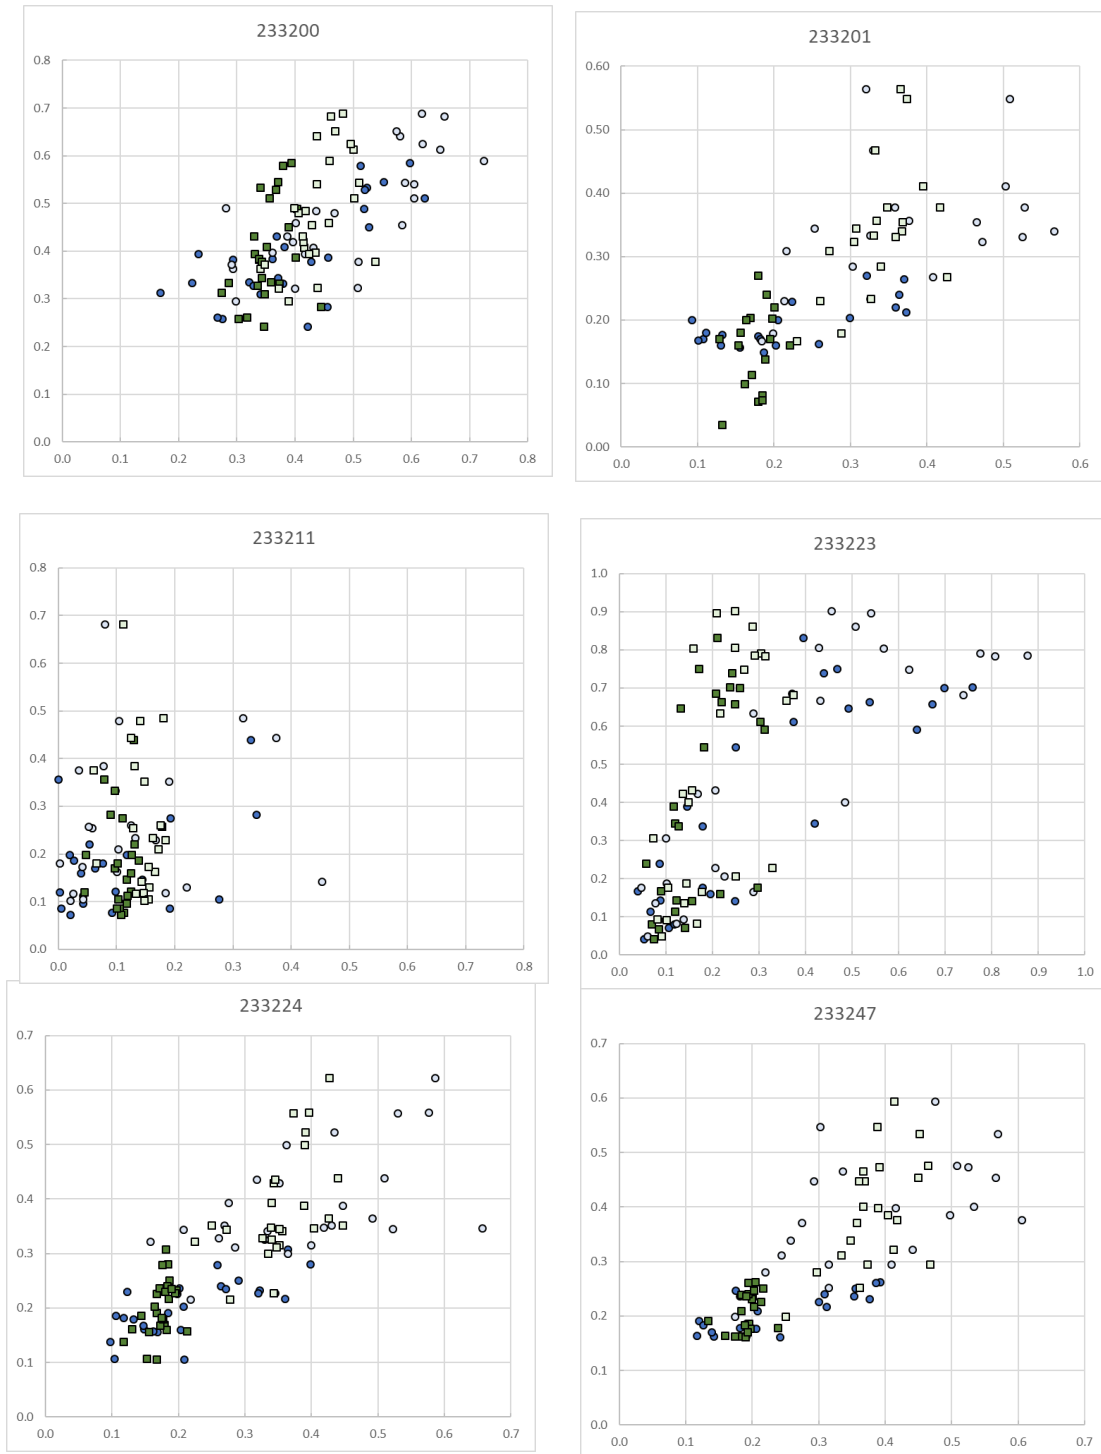

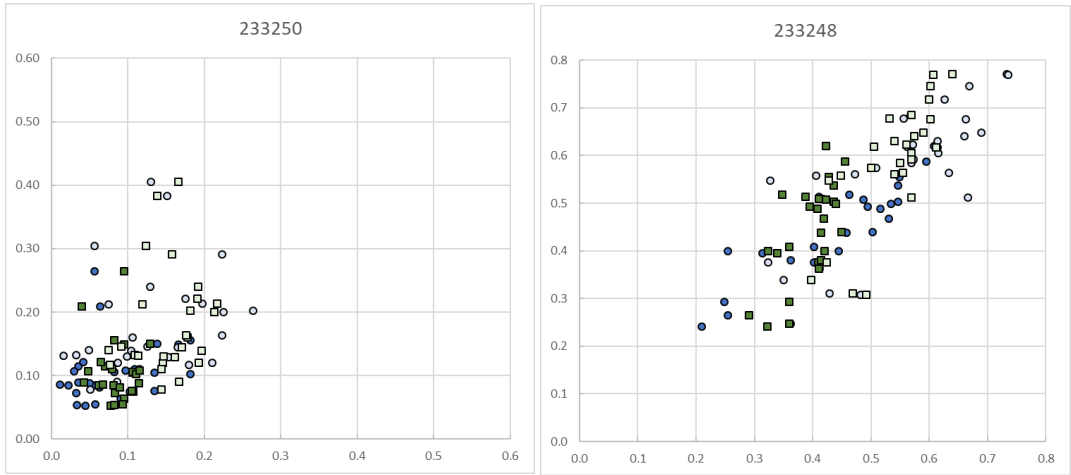

Figure S6. Comparison BFI calculated from the RDF and SM methods with the BFI from CMB using the variable and constant SC calculations for the Corangamite Catchment (symbols as for Fig. 5).

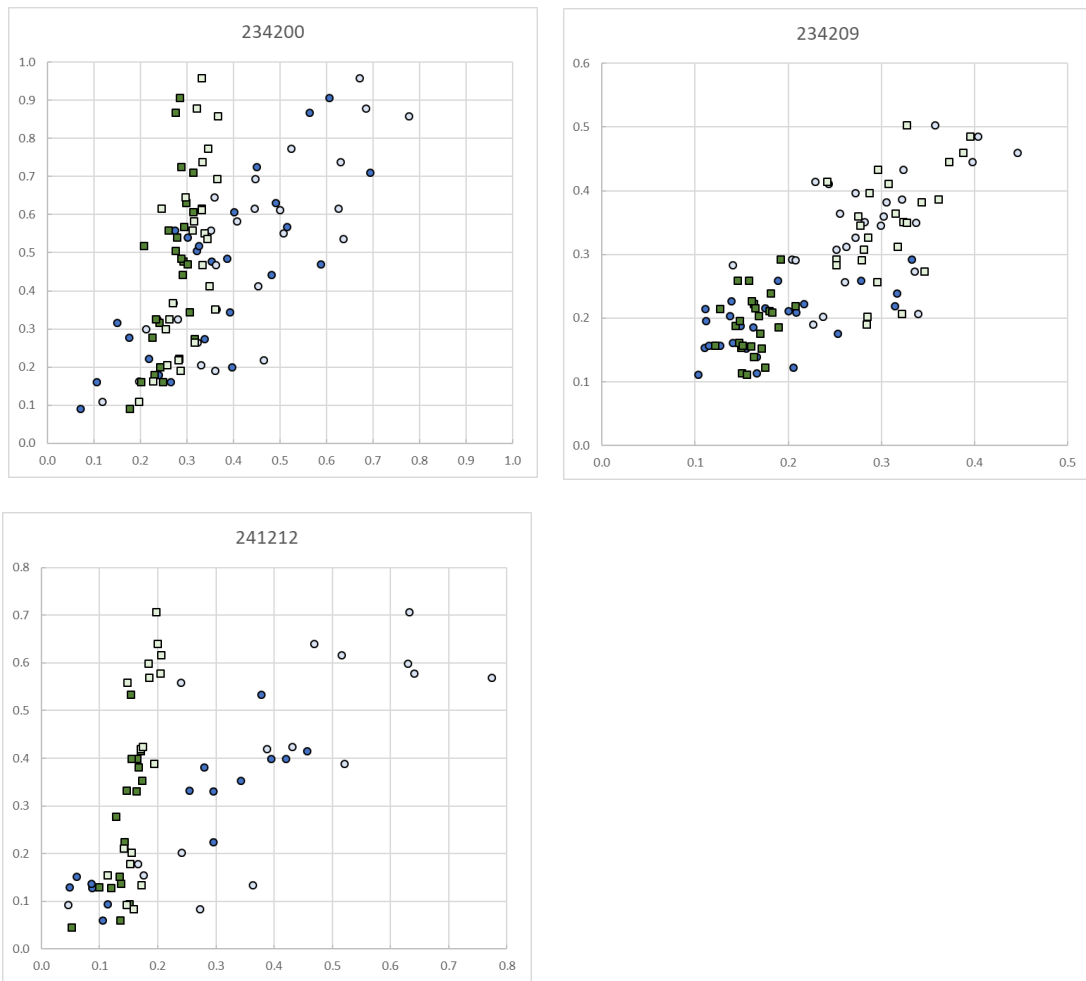



Figure S7. Comparison BFI calculated from the RDF and SM methods with the BFI from CMB using the variable and constant SC calculations for the Goulburn Catchment (symbols as for Fig. 5).

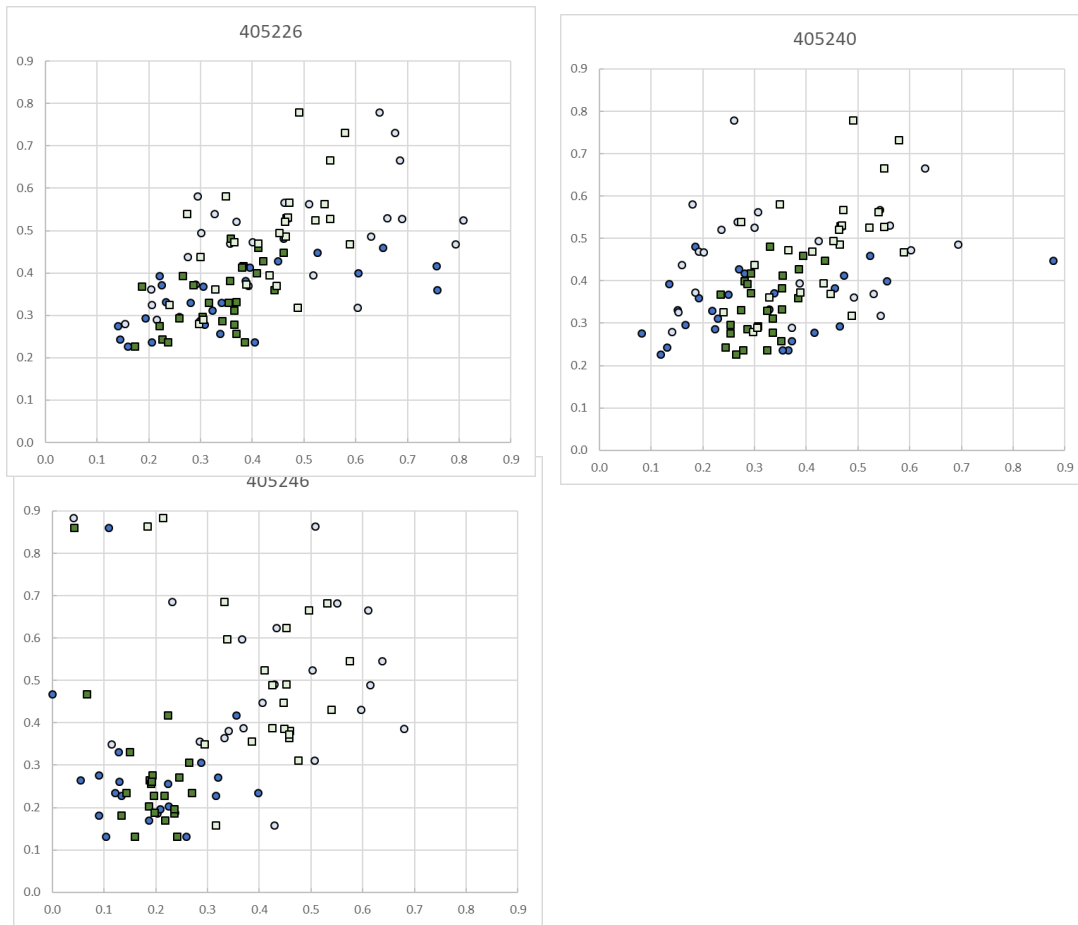

Figure S8. Comparison BFI calculated from the RDF and SM methods with the BFI from CMB using the variable and constant SC calculations for the Loddon Catchment (symbols as for Fig. 5).

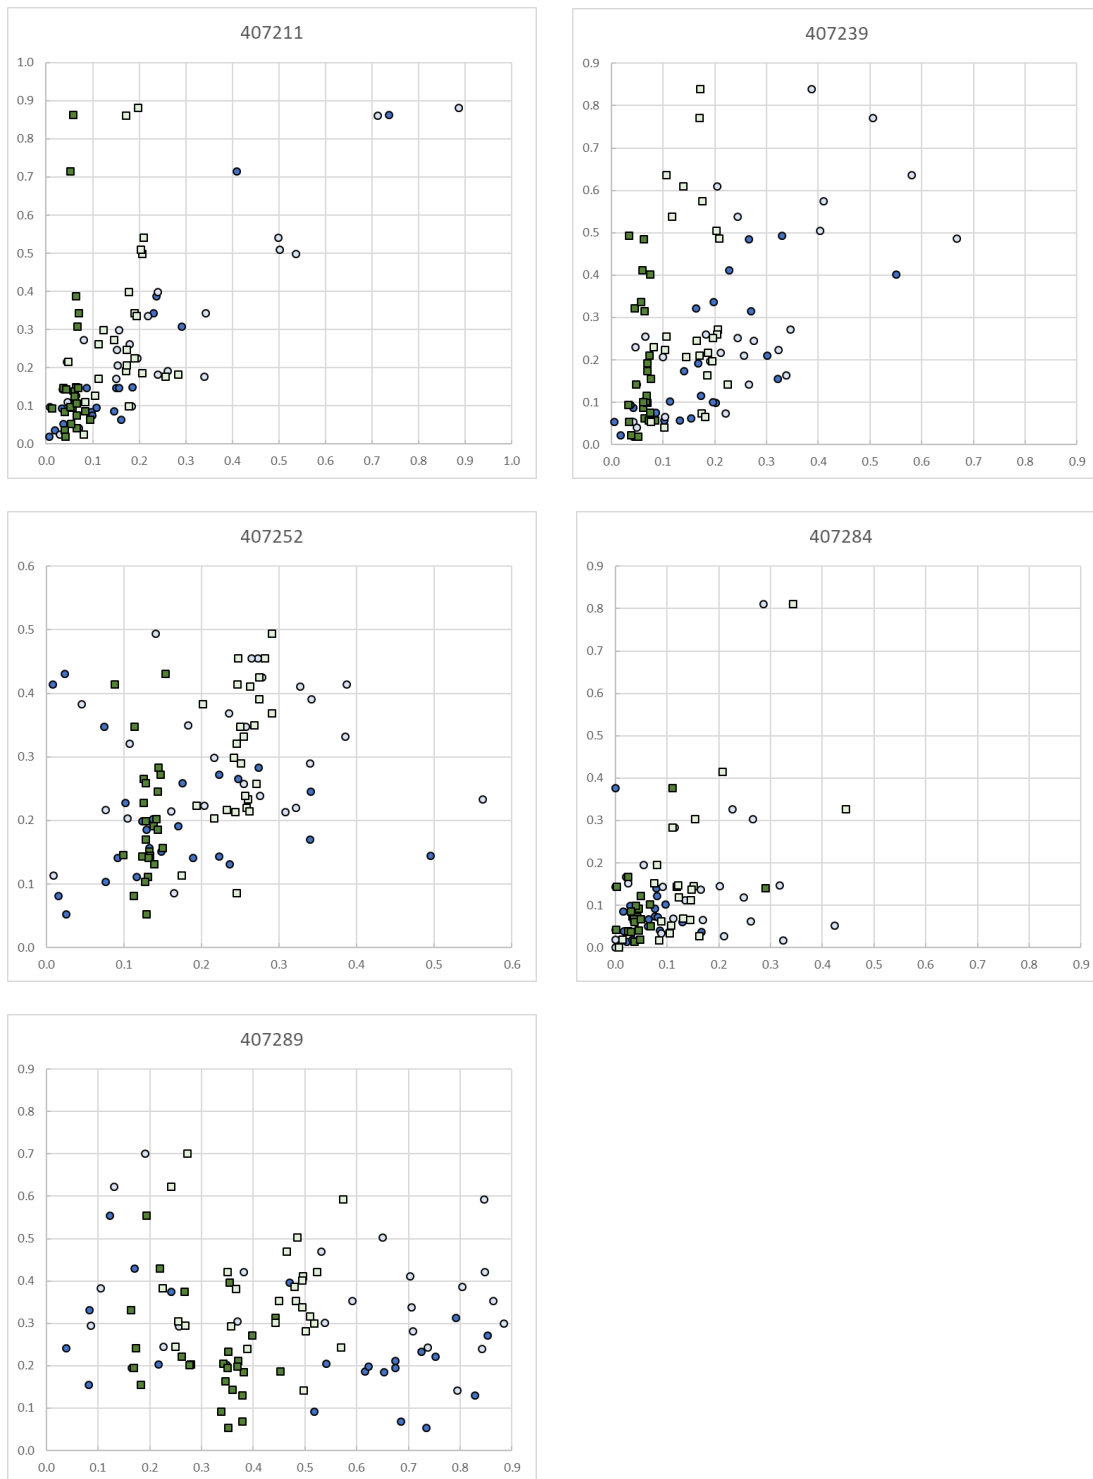

## References

Bureau of Meteorology, 2021. Commonwealth of Australia Bureau of Meteorology climate data online. <http://www.bom.gov.au/climate/data/>. Accessed July 10, 2021

Cartwright, I., Gilfedder, B., Hofmann, H.: Chloride imbalance in a catchment undergoing hydrological change: Upper Barwon River, southeast Australia. *Applied Geochemistry* 31, 187-198, 2013. <https://doi.org/10.1016/j.apgeochem.2013.01.003>

Cartwright, I., Gilfedder, B., and Hofmann, H.: Contrasts between estimates of baseflow help discern multiple sources of water contributing to rivers, *Hydrology and Earth System Sciences*, 18, 15-30, 2014. <https://doi.org/10.5194/hess-18-15-2014>

Cartwright, I. and Weaver, T.R.: Hydrogeochemistry of the Goulburn Valley region of the Murray Basin, Australia: implications for flow paths and resource vulnerability. *Hydrogeology Journal*, 13, 752-770, 2005. <https://doi.org/10.1007/s10040-003-0318-9>

Dahlhaus, P., Cox, J., Simmons, C., and Smitt, C.: Beyond hydrogeologic evidence: challenging the current assumptions about salinity processes in the Corangamite region, Australia. *Hydrogeology Journal*, 16, 1283-1298, 2008. <https://doi.org/10.1007/s10040-008-0313-2>

Department of Environment Land Water and Planning, 2021. State Government Victoria, Department of Environment Environment, Land, Water and Planning, Water Monitoring. <https://data.water.vic.gov.au/>. Accessed July 20, 2021.

Department of Jobs, Precincts and Regions, 2021. State Government Victoria, Energy and Earth Resources, Geology of Victoria online. <http://www.energyandresources.vic.gov.au/earth-resources/mapsreports-and-data/geovic> 2020. Accessed July 20, 2021.

Lawrence, C.R.: Murray Basin. In: Douglas J.G., Ferguson, J.A. (eds) *Geology of Victoria*. Geological Society of Australia (Victoria Division), Melbourne, Australia, pp. 352–363, 1988.
